# Supplementary material for: Synthesis and Evaluation of Two Long-Acting SSTR2 Antagonists for Radionuclide Therapy of Neuroendocrine Tumors
Source: MDPI journal article supplement (doi:10.3390/ph15091155), 2022-09-16
Supplement: s1 [file s1]

# Synthesis and Evaluation of Two Long-Acting SSTR2 Antagonists for Radionuclide Therapy of Neuroendocrine Tumors

Sofia Koustoulidou <sup>1,†</sup>, Maryana Handula <sup>1,†</sup>, Corrina de Ridder <sup>1</sup>, Debra Stuurman <sup>1</sup>, Savanne Beekman <sup>1</sup>, Marion de Jong <sup>1,‡</sup>, Julie Nonnekens <sup>1,2</sup> and Yann Seimbille <sup>1,3,\*</sup>

<sup>1</sup> Department of Radiology and Nuclear Medicine, Erasmus MC Cancer Institute, Erasmus University Medical Center Rotterdam, 3015 GD Rotterdam, The Netherlands

<sup>2</sup> Department of Molecular Genetics, Erasmus MC Cancer Institute, Erasmus University Medical Center Rotterdam, 3015 GD Rotterdam, The Netherlands

<sup>3</sup> Life Sciences Division, TRIUMF, Vancouver, BC V6T 2A3, Canada

\* Correspondence: y.seimbille@erasmusmc.nl; Tel.: +31-10-703-8961

† These authors contributed equally to this work.

‡ The author recently passed away.

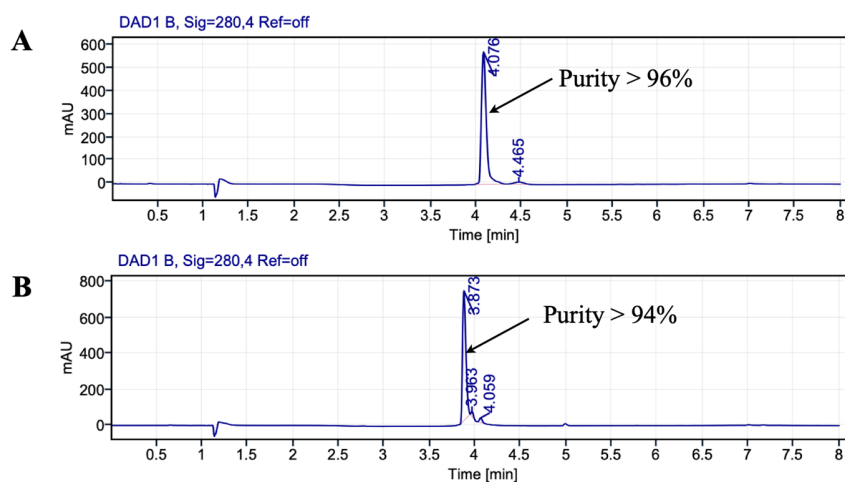

Figure S1. HPLC chromatograms of A) compound **8a** and B) compound **8b**.

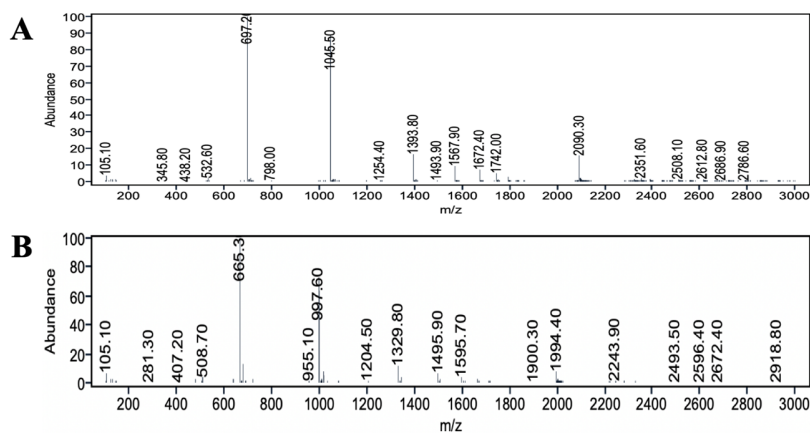

Figure S2. Mass spectra of A) compound **8a** and B) compound **8b**.

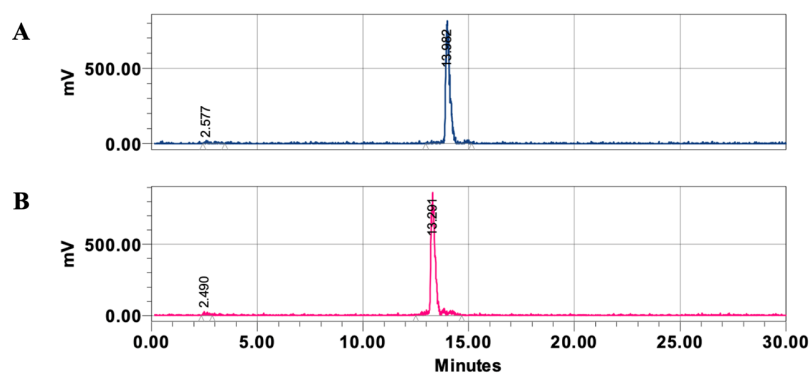

Figure S3. Radio-HPLC chromatograms of A)  $[^{177}\text{Lu}]\text{Lu-8a}$  and B)  $[^{177}\text{Lu}]\text{Lu-8b}$ .

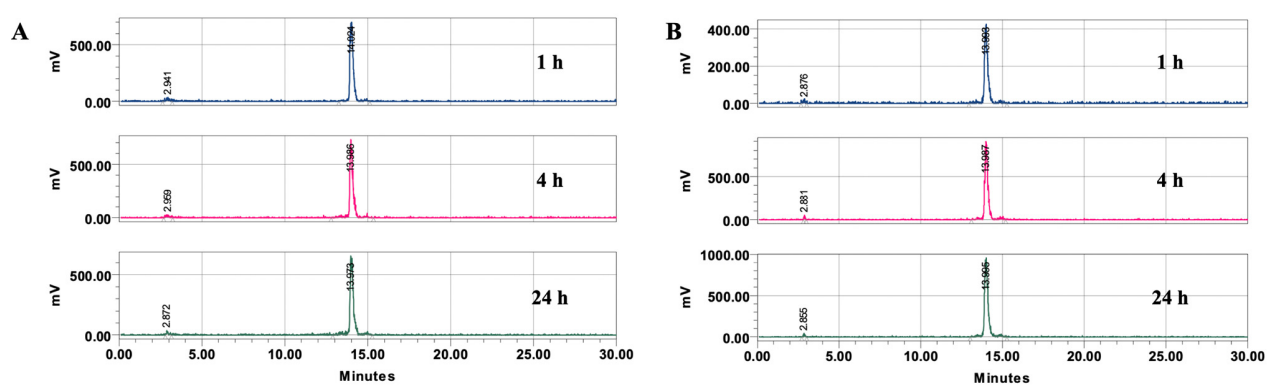

Figure S4. Radio-HPLC chromatograms of the stability studies performed for  $[^{177}\text{Lu}]\text{Lu-8a}$  at 1 h, 4 h and 24 h post incubation at 37 °C of the radioligand in A) PBS and B) mouse serum.

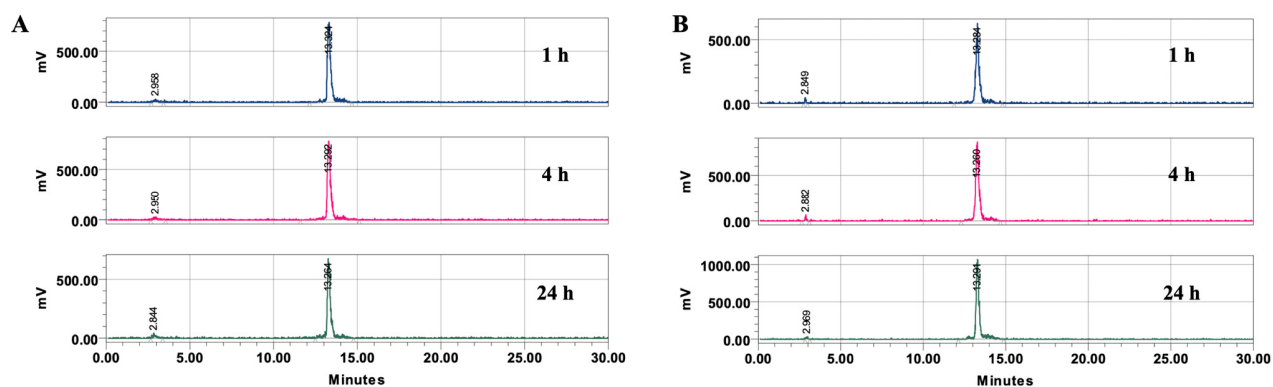

Figure S5. Radio-HPLC chromatograms of the stability studies performed for  $[^{177}\text{Lu}]\text{Lu-8b}$  at 1 h, 4 h and 24 h post incubation at 37 °C of the radioligand in A) PBS and B) mouse serum.

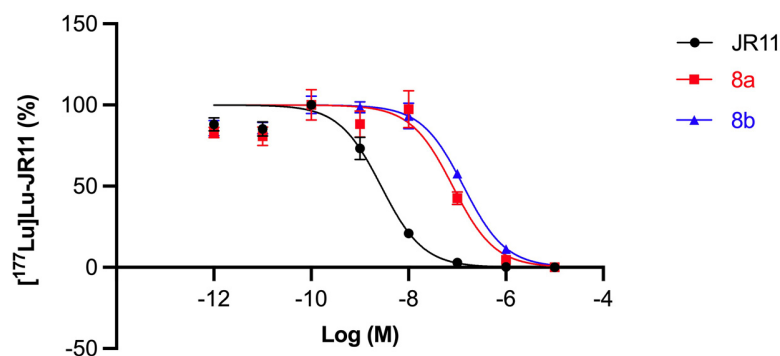

Figure S6. IC<sub>50</sub> curves of the *in vitro* competition binding assay for compounds **8a** and **8b** in increasing concentrations (M) while [<sup>177</sup>Lu]Lu-JR11 was used as radioligand.

Table S1. *Ex vivo* biodistribution analysis of [<sup>177</sup>Lu]Lu-**8a** (20 MBq/0.5 nmol) at 4, 24, 48 and 72 h post-injection (n = 4 mice/group). Data is represented as percentage of injected dose per gram of tissue (% ID/g).

| Organ       | 4 h        | 24 h       | 24 h - Block | 48 h       | 72 h       |
|-------------|------------|------------|--------------|------------|------------|
| Blood       | 21.3 ± 1.1 | 18.1 ± 4.2 | 14.9 ± 2.1   | 12.9 ± 1.2 | 8.6 ± 0.5  |
| Tumor       | 4.1 ± 0.5  | 6.5 ± 0.2  | 5.2 ± 0.6    | 7.3 ± 0.4  | 7.3 ± 0.9  |
| Heart       | 7.6 ± 1.2  | 5.1 ± 0.7  | 5.1 ± 0.6    | 4.8 ± 0.5  | 3.9 ± 0.7  |
| Lung        | 9.9 ± 2.9  | 7.5 ± 0.6  | 5.4 ± 0.6    | 7.2 ± 0.3  | 6.0 ± 0.5  |
| Liver       | 4.6 ± 1.2  | 3.7 ± 0.2  | 2.9 ± 0.5    | 3.6 ± 0.2  | 2.9 ± 0.3  |
| Spleen      | 3.2 ± 0.7  | 3.8 ± 0.4  | 3.6 ± 0.6    | 5.8 ± 0.6  | 5.4 ± 0.2  |
| Stomach     | 3.8 ± 0.4  | 3.1 ± 1.4  | 1.7 ± 0.4    | 3.3 ± 1.2  | 3.0 ± 0.5  |
| Intestine   | 2.5 ± 0.2  | 1.7 ± 0.1  | 1.3 ± 0.2    | 1.4 ± 0.1  | 1.1 ± 0.0  |
| Pancreas    | 7.2 ± 0.3  | 6.6 ± 0.3  | 2.4 ± 0.4    | 6.3 ± 0.7  | 5.3 ± 1.2  |
| Kidneys     | 9.6 ± 1.2  | 18.4 ± 1.9 | 19.7 ± 1.4   | 22.6 ± 1.9 | 21.6 ± 1.4 |
| Muscle      | 0.8 ± 1.1  | 1.1 ± 0.1  | 0.8 ± 0.1    | 1.2 ± 0.5  | 0.8 ± 0.1  |
| Skin        | 5.9 ± 1.1  | 5.4 ± 0.9  | 3.2 ± 1.2    | 6.3 ± 1.6  | 4.8 ± 0.3  |
| Bone        | 1.3 ± 1.8  | 1.5 ± 1.1  | 1.5 ± 0.3    | 0.9 ± 0.4  | 1.2 ± 1.0  |
| Bone Marrow | 1.2 ± 2.0  | -0.2 ± 0.1 | -0.8 ± 1.7   | -0.3 ± 0.1 | -0.1 ± 0.1 |

Table S2. *Ex vivo* biodistribution analysis of [<sup>177</sup>Lu]Lu-JR11 (20 MBq/0.5 nmol) at 4, 24, 48 and 72 h post-injection (n = 4 mice/group). Data is represented as percentage of injected dose per gram of tissue (% ID/g).

| Organ       | 4 h        | 24 h       | 24 h - Block | 48 h       | 72 h       |
|-------------|------------|------------|--------------|------------|------------|
| Blood       | -0.1 ± 0.0 | -0.1 ± 0.1 | -0.1 ± 0.1   | 0.0 ± 0.0  | -0.1 ± 0.0 |
| Tumor       | 8.4 ± 0.5  | 6.1 ± 0.5  | 0.4 ± 0.0    | 4.6 ± 0.3  | 3.6 ± 0.4  |
| Heart       | 0.0 ± 0.0  | 0.0 ± 0.0  | 0.0 ± 0.0    | 0.0 ± 0.0  | -0.1 ± 0.0 |
| Lung        | 1.3 ± 0.3  | 0.4 ± 0.0  | 0.1 ± 0.0    | 0.2 ± 0.0  | 0.1 ± 0.0  |
| Liver       | 0.5 ± 0.0  | 0.3 ± 0.0  | 0.3 ± 0.0    | 0.2 ± 0.0  | 0.2 ± 0.0  |
| Spleen      | 0.3 ± 0.1  | 0.1 ± 0.0  | 0.0 ± 0.0    | 0.0 ± 0.0  | 0.0 ± 0.0  |
| Stomach     | 1.7 ± 0.3  | 1.5 ± 1.2  | 0.1 ± 0.1    | 0.6 ± 0.2  | 0.4 ± 0.1  |
| Intestine   | 0.5 ± 0.1  | 0.2 ± 0.0  | 0.1 ± 0.0    | 0.1 ± 0.0  | 0.1 ± 0.0  |
| Pancreas    | 3.5 ± 0.4  | 0.9 ± 0.3  | 0.1 ± 0.0    | 0.6 ± 0.1  | 0.3 ± 0.0  |
| Kidneys     | 12.6 ± 1.2 | 8.6 ± 2.3  | 5.9 ± 1.2    | 4.1 ± 0.2  | 3.4 ± 1.4  |
| Muscle      | -0.1 ± 0.0 | -0.1 ± 0.0 | -0.1 ± 0.0   | -0.1 ± 0.0 | -0.1 ± 0.0 |
| Skin        | 0.3 ± 0.1  | 0.0 ± 0.1  | -0.1 ± 0.1   | -0.2 ± 0.1 | -0.4 ± 0.2 |
| Bone        | 0.1 ± 0.0  | -0.6 ± 0.4 | -0.4 ± 0.5   | -0.2 ± 0.2 | -0.1 ± 0.1 |
| Bone Marrow | 1.1 ± 2.0  | 0.1 ± 0.0  | 0.2 ± 0.0    | 0.1 ± 0.0  | 0.1 ± 0.0  |
